# Supplementary material for: Who is (not) complying with the U. S. social distancing directive and why? Testing a general framework of compliance with virtual measures of social distancing
Source: PLOS journal article supplement (doi:10.1371/journal.pone.0247520), 2021-02-24
Supplement: S2 (10.1371/journal.pone.0247520.s002) [file journal.pone.0247520.s002]

## S2 Material

### Demographic Details for Each of the Four Sub-studies

As noted in the main text, all participants completed a core survey, but also were randomly assigned to four distinct surveys with specific questions. The four subsets involved: (a) source beliefs and science literacy, (b) news sources and belief in conspiracy theories, (c) compassion and concern for others vulnerability to COVID-19, and (d) perceived vulnerability to disease and disgust sensitivity. The following table presents demographic details for each of the four groups, as well as the total sample. As expected on the basis of the random assignment, the groups do not differ on any of the three variables (all  $p$ 's > .30).

| Variable                           |            | Full Sample | Subset A | Subset B | Subset C | Subset D |
|------------------------------------|------------|-------------|----------|----------|----------|----------|
| N                                  |            | 2001        | 497      | 499      | 499      | 506      |
| Gender                             |            |             |          |          |          |          |
|                                    | Female     | 903         | 229      | 224      | 214      | 236      |
|                                    | Male       | 1084        | 265      | 269      | 283      | 267      |
|                                    | Unreported | 14          | 3        | 6        | 2        | 3        |
| Age                                |            |             |          |          |          |          |
|                                    | Min-Max    | 18-89       | 18-89    | 18-77    | 19-76    | 18-76    |
|                                    | Mean       | 38.66       | 39.29    | 38.64    | 38.11    | 38.60    |
|                                    | SD         | 12.33       | 12.54    | 12.08    | 12.38    | 12.32    |
| Political Orientation <sup>a</sup> |            |             |          |          |          |          |
|                                    | Mean       | 3.60        | 3.70     | 3.65     | 3.50     | 3.56     |
|                                    | SD         | 1.84        | 1.80     | 1.86     | 1.86     | 1.84     |

<sup>a</sup>Measured on a 1 "Extremely Liberal" to 7 "Extremely Conservative" scale.
